# Supplementary material for: CannibiSenS: an on-demand rapid screen for THC in human saliva
Source: Royal Society of Chemistry journal article supplement (doi:10.1039/d3an00522d), 2023-01-01
Supplement: d3an00522d1.pdf [file d3an00522d1.pdf]

## Supplementary Information

# CannibiSenS: An on-demand rapid screen for THC in human saliva

Nathan Kodjo Mintah Churcher,<sup>a†</sup> Vikram Narayanan Dhamu,<sup>a†</sup> and Shalini Prasad<sup>\*a</sup>

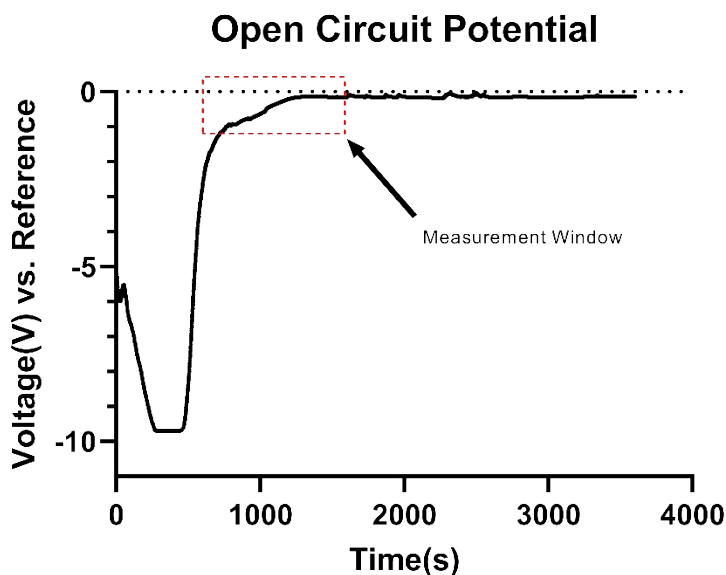

Figure S1. Open Circuit Potential of the sensing platform in PBS

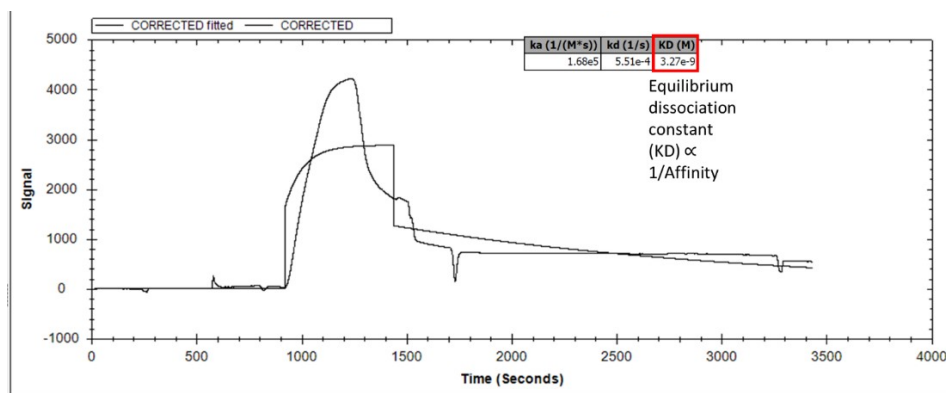

Figure S2. One-to-One fit model characteristics for antibody binding to substrate.

Fitted model binding characteristics for antibody binding to substrate is shown in Fig. S2,  $k_a$  here signifies how quickly the antibody binds to the substrate represented by the steep increasing slope, while the  $k_d$  is based on how fast the antibody dissociates from the substrate, represented by the flat line in the fitted plot.

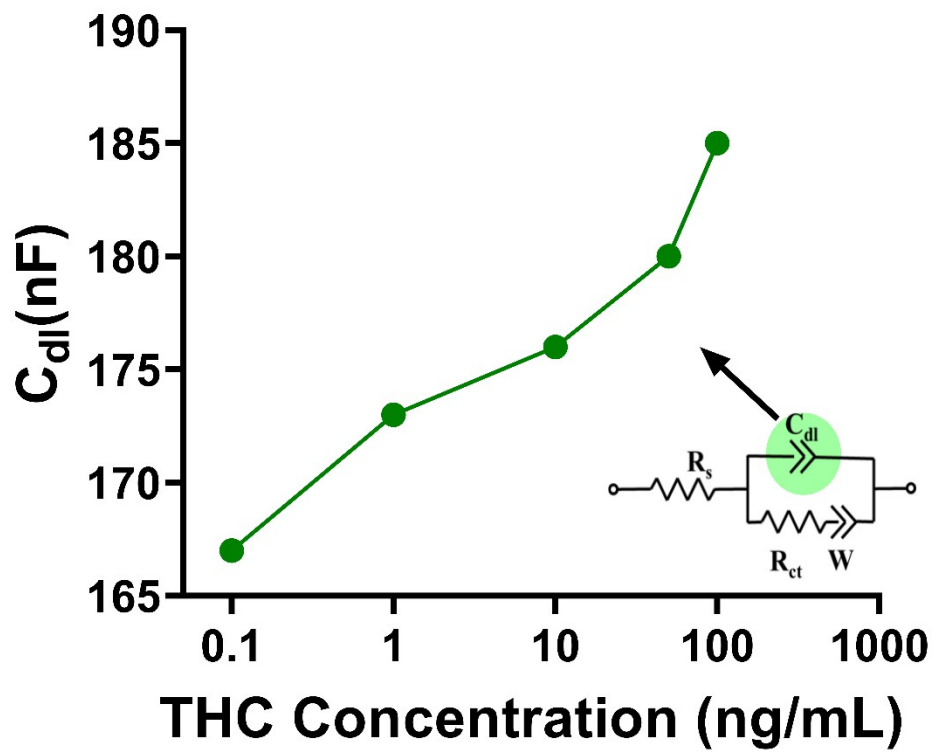

Figure S3. Change in double layer capacitance from fitted data from benchtop data

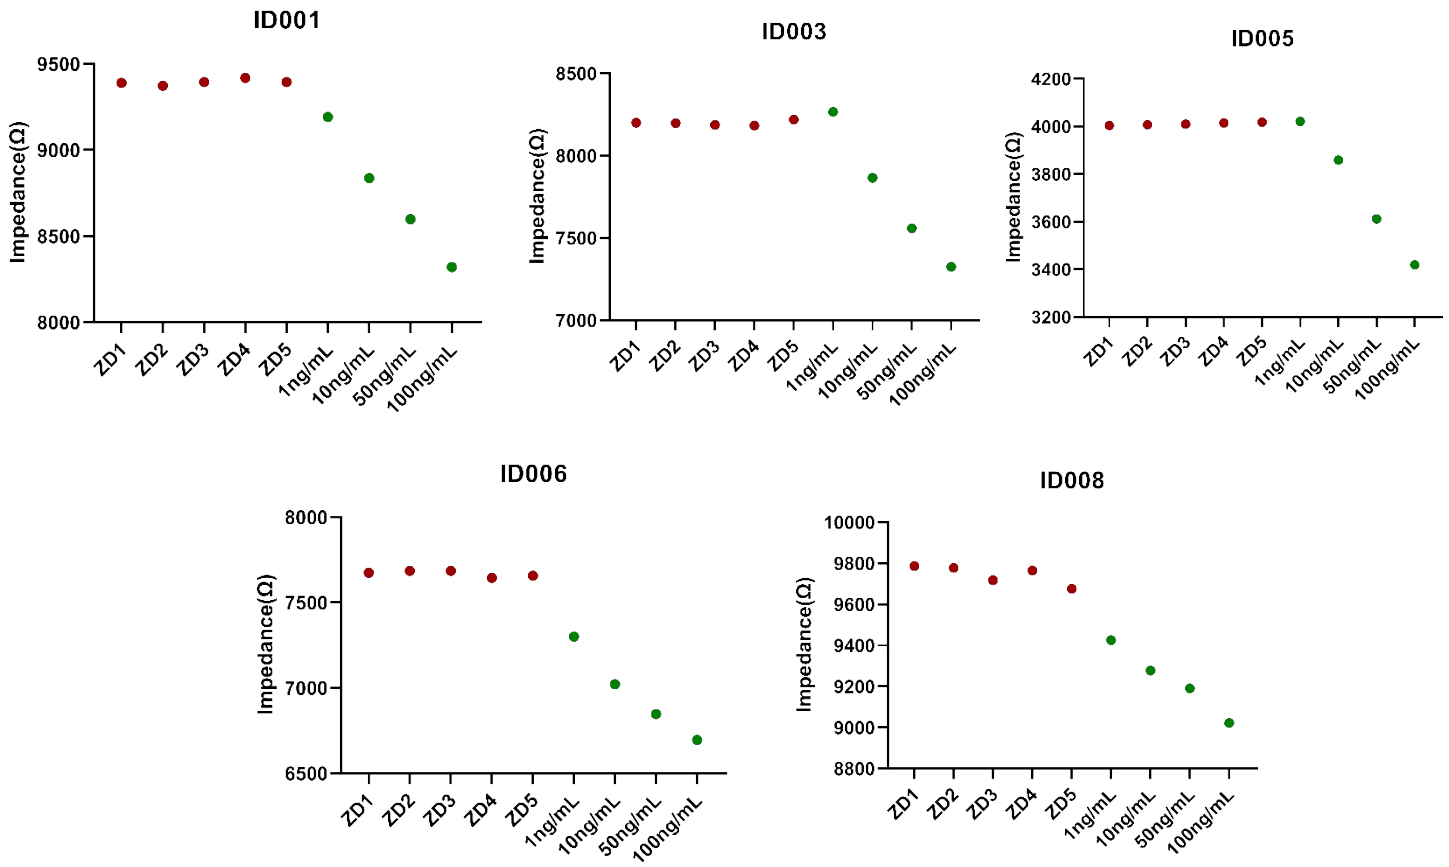

Figure S4. Impedance measurements for THC deficient human saliva (ZD1-ZD5) and increasing doses of THC in human saliva

### CDR Fitting for THC on benchtop

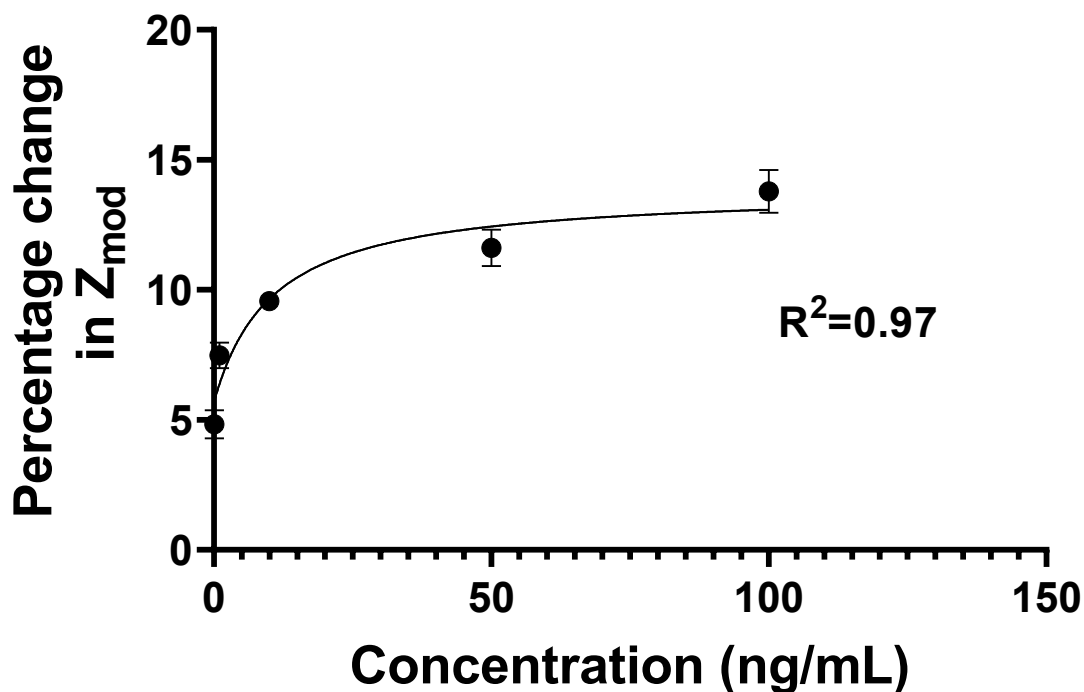

Figure S5. CDR Fitting of the dose response for THC on benchtop device

Table S1. Electrochemical methods used in the detection of THC in saliva

| Detection Technique           | Time of Detection | Matrix Modifications / Volume Used                            | Biomarker Detected | Range of Detection | Limit of Detection (LOD) | Electrode Set-up                                                                           | References   |
|-------------------------------|-------------------|---------------------------------------------------------------|--------------------|--------------------|--------------------------|--------------------------------------------------------------------------------------------|--------------|
| Square Wave Voltammetry (SWV) | ~3 mins           | 10X PBS dilution of collected saliva/ 200 $\mu$ L             | THC                | 1-6 $\mu$ M        | 0.5 $\mu$ M              | W.E printed from 1% MWCNT modified carbon ink coupled with Ag/AgCl in a 3-electrode system | <sup>1</sup> |
| Square Wave Voltammetry       | 38 seconds        | Saliva samples were diluted with either methanol (or PBS or a | THC                | 2-25ng/mL          | 1.6 ng/mL in real saliva | Screen-printed carbon-based electrodes couples with Ag/AgCl in a                           | <sup>2</sup> |

|                                                        |                                                    |                                                                                         |                 |                     |                  |                                                                                                                                                  |           |
|--------------------------------------------------------|----------------------------------------------------|-----------------------------------------------------------------------------------------|-----------------|---------------------|------------------|--------------------------------------------------------------------------------------------------------------------------------------------------|-----------|
|                                                        |                                                    | combination of both/100µL                                                               |                 |                     |                  | 3-electrode system                                                                                                                               |           |
| Electrochemical Impedance Spectroscopy                 | Measurement was under a minute                     | Authors didn't mention any modifications made to the saliva collected                   | THC- BSA hapten | 100pg/mL - 100ng/mL | 100pg/mL         | Gold on PET (polyethylene terephthalate) substrates                                                                                              | 3         |
| Organic electrochemical transistor (OECT)              | ~5 mins                                            | Detection of THC in synthetic saliva/10 µL                                              | THC             | 0.1nM- 5 µM         | 1nM (0.31ug/mL)  | Platinum wires coupled with OECT as the WE and CE and Ag/AgCl in a 3-electrode system                                                            | 4         |
| Differential Pulse Voltammetry                         | 1 min                                              | Saliva was filtered and diluted (50% or 90%) with 20mM PBS/ 1 µM methylene blue/ ~60 µL | THC             | 1-100nM             | 5nM              | Aptamer modified gold-SPE combined with a microfluidic cartridge setup                                                                           | 5         |
| Cyclic Voltammetry (CV)/ Square Wave Voltammetry (SWV) | ~3.5mins                                           | Saliva was diluted/250 µL                                                               | THC             | 2.5-40 pmol         | 4nM-SWV 12nM- CV | A 3-electrode system with a Pt mesh counter electrode, a saturated calomel reference electrode (SCE), and porous carbon paper working electrodes | 6         |
| Non-Faradaic Electrochemical impedance spectroscopy    | Measurement under a minute with 15 mins incubation | Pooled human sweat (diluted in a 2:1 ratio with 0.1x PBS)/5µL                           | THC             | 0.1- 100ng/mL       | 0.1ng/mL         | 2 gold interdigitated electrodes fabricated on printed                                                                                           | This work |

|  |      |  |  |  |  |                        |  |
|--|------|--|--|--|--|------------------------|--|
|  | time |  |  |  |  | circuit board<br>(PCB) |  |
|--|------|--|--|--|--|------------------------|--|

## References

- 1 R. K. Mishra, J. R. Sempionatto, Z. Li, C. Brown, N. M. G.- Talanta and undefined 2020, *Elsevier*.
- 2 G. A. Ortega, S. R. Ahmed, S. K. Tuteja, S. Srinivasan and A. R. Rajabzadeh, *Talanta*, 2022, **236**, 122863.
- 3 H. Stevenson, A. Bacon, K. M. Joseph, W. R. W. G.-S. reports and undefined 2019, *nature.com*.
- 4 D. Majak, J. Fan, S. Kang and M. Gupta, *J. Mater. Chem. B*, 2021, **9**, 2107–2117.
- 5 L. Kékedy-Nagy, J. M. Perry, S. R. Little, O. Y. Llorens and S. C. C. Shih, *Biosens. Bioelectron.*, , DOI:10.1016/j.bios.2022.114998.
- 6 M. Renaud-Young, R. M. Mayall, V. Salehi, M. Goledzinowski, F. J. E. Comeau, J. L. MacCallum and V. I. Birss, *Electrochim. Acta*, 2019, **307**, 351–359.
